# Supplementary material
Source: MDPI journal article supplement (https://www.mdpi.com/2073-4433/12/11/1370)
Supplement: s1 [file s1 › atmosphere-1399354-supplementary.pdf]

# Supplementary Materials: An Application of the LCZ Approach In Surface Urban Heat Island Mapping in Sofia, Bulgaria

Stelian Dimitrov \*, Anton Popov and Martin Iliev

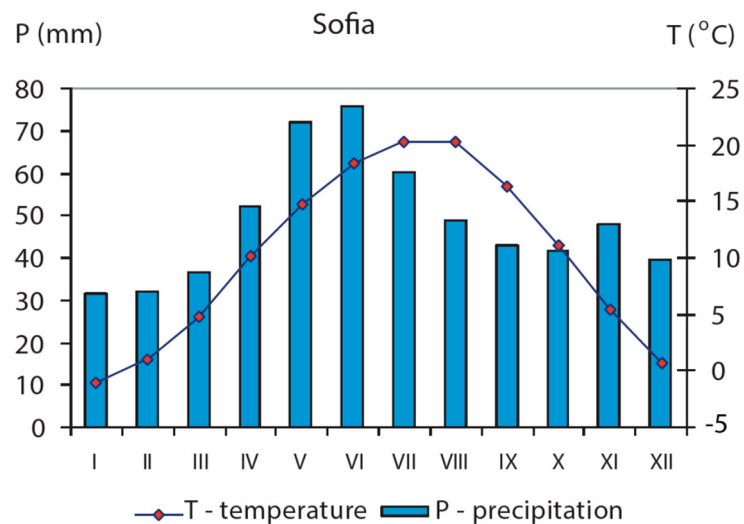

**Figure S1.** Climograph of monthly averages of climate data—temperature and precipitation in Sofia (1896–2018).

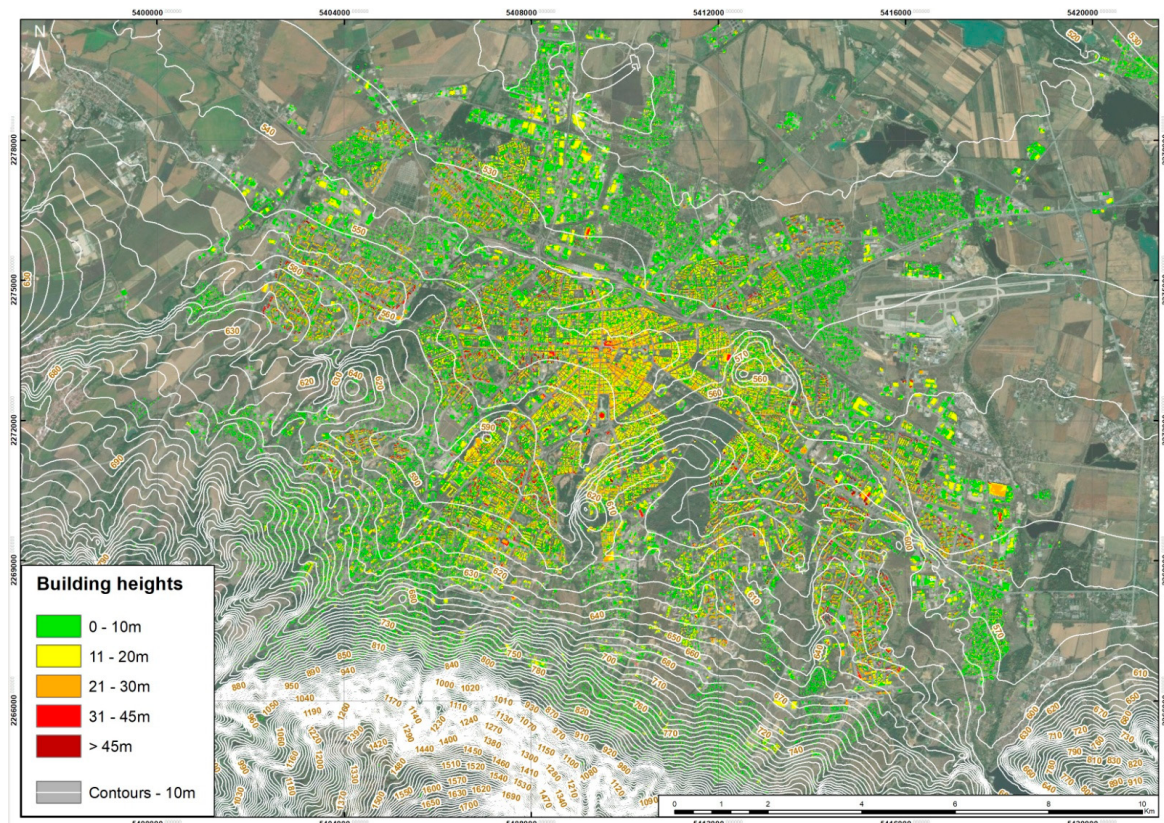

**Figure S2.** Building heights (based on Urban atlas—Building Height 2012, <https://land.copernicus.eu/local/urban-atlas/building-height-2012>, accessed on 18 October 2021).
